# Supplementary material
Source: publisher site journal article supplement (https://www.dovepress.com/article/256227)
Supplement: Supplementary file 1 [file get_supplementary_file.php]

**Supporting Information**

# Tailoring nanoparticle-biofilm interactions to increase efficacy of antimicrobial agents against *Staphylococcus aureus*

Stephanie Fulaz1‡, Henry Devlin1‡, Stefania Vitale1, Laura Quinn1, James P. O’Gara2 and Eoin Casey1*

1 UCD School of Chemical and Bioprocess Engineering, University College Dublin, Belfield, Dublin 4, Dublin, Ireland; 2 Department of Microbiology, School of Natural Sciences, National University of Ireland, Galway, Ireland

‡ These authors contributed equally to this work

* Correspondence: Eoin Casey

Professor & Head of School, UCD School of Chemical and Bioprocess Engineering

University College Dublin, Belfield, Dublin 4, Dublin, Ireland

Email [eoin.casey@ucd.ie](mailto:eoin.casey@ucd.ie)

# Materials and methods

**1.1 EPS extraction and characterization**

To ensure sufficient biomass formation to carry out an EPS extraction, biofilms were cultured in 24 well plates for 48 h at 37 ºC. MRSA biofilm formation was carried out in TSB supplemented with 2 % glucose while MSSA biofilms were cultured in TSB supplemented with 4 % NaCl. Following growth, planktonic cells were removed, and the weight of the biofilm formed was recorded. the biofilms were then removed by scraping and resuspended in NaCl (0.9%). EPS extraction was carried out using a 1% cation exchange resin (Dowex). The samples were incubated with the resin in the dark at 4°C for 2 h with shaking at 300 rpm. The sample was then centrifuged at 4°C for 30 minutes at 20,000 x g to separate the EPS components from the cellular debris. Finally, the supernatant was filtered using a filter membrane (0.2 µm). The EPS extract was stored at -80°C until component quantification was carried out. A standard Lowry method was used to quantify proteins while a phenol-sulfuric acid method was used to quantify carbohydrate concentration. To assess the natural charge of the biofilm, samples were recovered as described above and the charge was measured using a Zetasizer Nano-ZS apparatus (Malvern Instruments).


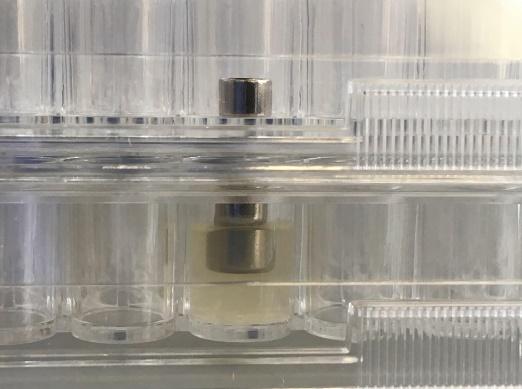


**Figure S1.** Culture conditions for *S. aureus* biofilm formation on metallic pegs.

1. **Results**

**
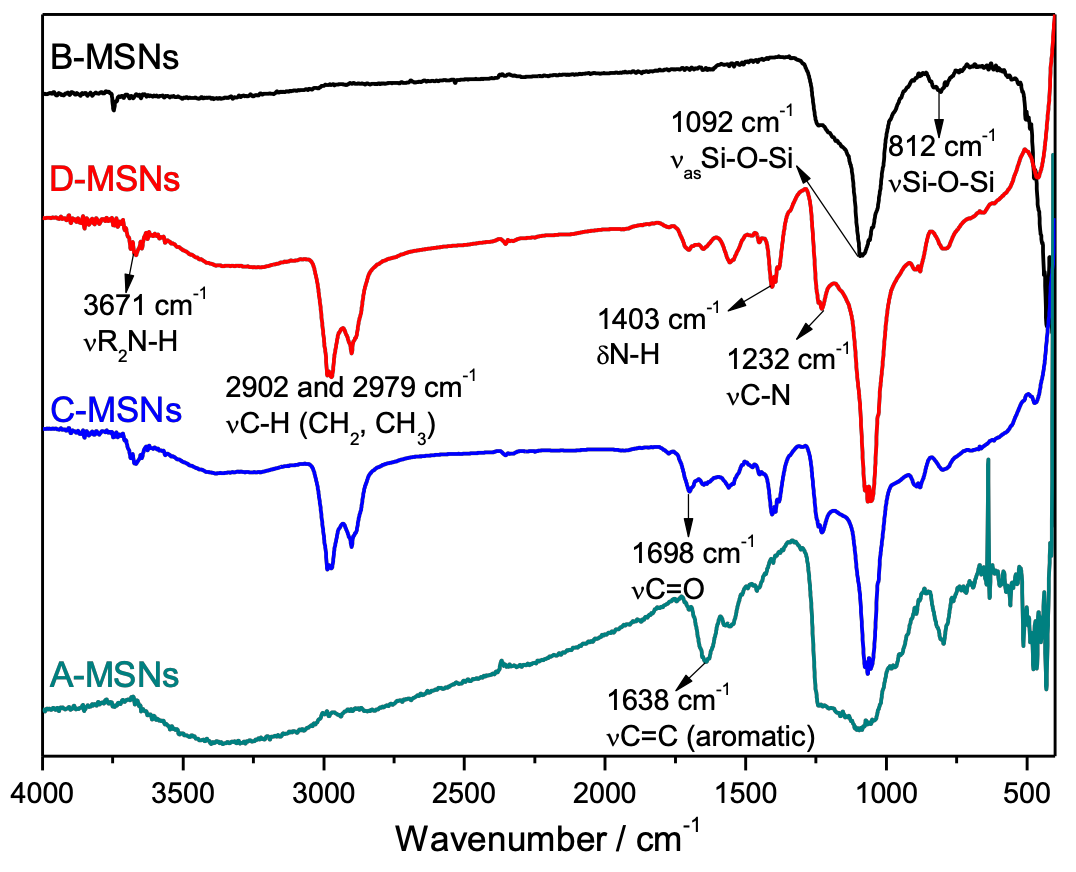
**

**Figure S2.** FT-IR spectra of functionalized MSNs (bare (MSN-B)- black, amine (MSN-D)-red, carboxyl (MSN-C)-blue and aromatic (MSN-A)-green).

**Table S1.** EPS main components quantification for MRSA and MSSA (relative to total biomass) and charge measurement data of the biofilms (solution of bacterial cells and EPS).

| **Strain** | **[Protein]a / μg mg-1** | **[Polysaccharide]b / μg mg-1** | **Zeta Potentialc / mV** |
| --- | --- | --- | --- |
| BHICC (MRSA) | 36.2 | 1.4 | -46 ± 6 |
| 8325-4 (MSSA) | 3.1 | 42.3 | -49 ± 8 |

aDetermined using Lowry method

bDeterminedwith Phenol-sulfuric acid method

cMeasured by Zetasizer Nano-ZS

**Table S2.** Antimicrobial effects offree vancomycin and vancomycin loaded MSNs against MRSA and MSSA planktonic bacteria determined by minimum inhibitory concentration (MIC) and minimum biofilm inhibitory concentration (MBIC)

|  | Vancomycin (µg mL-1) | | Van@MSN-B  (µg mL-1) | | Van@MSN-D  (µg mL-1) | | Van@MSN-C  (µg mL-1) | | Van@MSN-A  (µg mL-1) | |
| --- | --- | --- | --- | --- | --- | --- | --- | --- | --- | --- |
| Strain | **MIC** | **MBIC** | **MIC** | **MBIC** | **MIC** | **MBIC** | **MIC** | **MBIC** | **MIC** | **MBIC** |
| MRSA | <4 | <8 | 4 | >7 | <4 | >4 | 3 | >3 | <4 | >4 |
| MSSA | 2 | <4 | 2 | <7 | 2 | 4 | <3 | >3 | 2 | 4 |
